# Supplementary material
Source: ML conference proceedings conference paper supplement (https://openaccess.thecvf.com/content/CVPR2021/html/Yuan_SimPoE_Simulated_Character_CVPR_2021_paper.html)
Supplement: Supplementary file 1 [file Yuan_SimPoE_Simulated_Character_CVPR_2021_supplemental.zip]

Archive with 6 entries (6 files):
- README.txt
- __MACOSX/._README.txt
- supp.pdf
- __MACOSX/._supp.pdf
- video_link.txt
- __MACOSX/._video_link.txt
