# Supplementary material
Source: ML conference proceedings conference paper supplement (https://openaccess.thecvf.com/content/CVPR2021/html/Yuan_SimPoE_Simulated_Character_CVPR_2021_paper.html)
Supplement: Supplementary file 1 [file Yuan_SimPoE_Simulated_Character_CVPR_2021_supplemental.zip › README.txt]

==================================================================
"SimPoE: Simulated Character Control for 3D Human Pose Estimation"
 Supplementary Materials
==================================================================

The supplementary materials include
- a PDF document: supp.pdf
- a link to project website with videos: https://www.ye-yuan.com/simpoe
