# Supplementary material
Source: ML conference proceedings conference paper supplement (https://openaccess.thecvf.com/content/CVPR2021/html/Yuan_SimPoE_Simulated_Character_CVPR_2021_paper.html)
Supplement: Supplementary file 1 [file Yuan_SimPoE_Simulated_Character_CVPR_2021_supplemental.zip › video_link.txt]

The supplementary video can be found at https://www.ye-yuan.com/simpoe
